# Supplementary figures and images for: Multi-stimuli responsive photonic hydrogel based on a novel photonic crystal template containing gold nanorods
Source: Royal Society of Chemistry journal article supplement (doi:10.1039/d3sm01349a), 2023-11-27

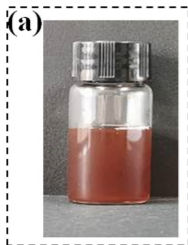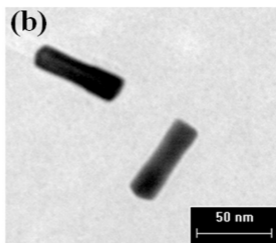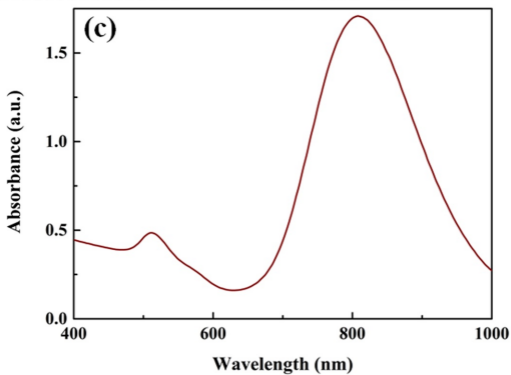

Supplement: d3sm01349a1.pdf [file d3sm01349a1.pdf]

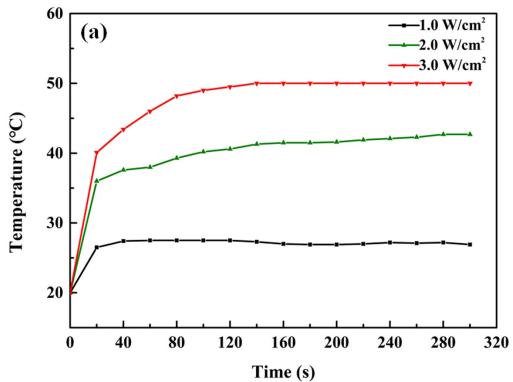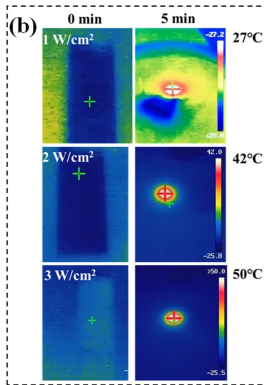

Supplement: d3sm01349a2.pdf [file d3sm01349a2.pdf]

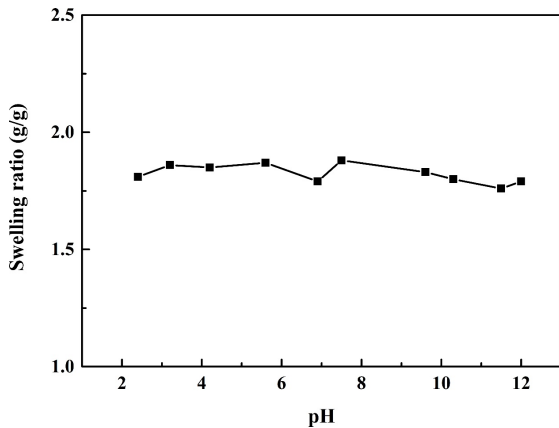

Supplement: d3sm01349a3.pdf [file d3sm01349a3.pdf]
